# Supplementary material for: Formula Milk Supplementation and Bone Acquisition in 4–6 Years Chinese Children: A 12-Month Cluster-Randomized Controlled Trial
Source: MDPI journal article supplement (doi:10.3390/nu15082012), 2023-04-21
Supplement: s1 [file s1]

## Supplementary Tables S1–S3

**Table S1.** Composition of formula milk powder.

| Nutrition Ingredients Category                   | Weight (per 100 g) | Nutrient Reference Values (NRV)% |
|--------------------------------------------------|--------------------|----------------------------------|
| Energy, kJ                                       | 1897               | 23%                              |
| Protein, g                                       | 19.0               | 32%                              |
| Fat, g                                           | 18.0               | 30%                              |
| Carbohydrates, g                                 | 52.0               | 17%                              |
| Dietary fiber<br>(In terms of oligogalactose), g | 3.0                | 12%                              |
| Sodium, mg                                       | 400                | 20%                              |
| Vitamin A, µgRE                                  | 430                | 54%                              |
| Vitamin D, µg                                    | 7.5                | 150%                             |
| Vitamin E, mg α-TE                               | 2.30               | 16%                              |
| Vitamin K, µg                                    | 45.0               | 56%                              |
| Vitamin B <sub>1</sub> , mg                      | 0.75               | 54%                              |
| Vitamin B <sub>2</sub> , mg                      | 0.30               | 21%                              |
| Vitamin C, mg                                    | 30.0               | 30%                              |
| Niacin, mg                                       | 2.70               | 19%                              |
| Folic acid, µgDFE                                | 140                | 35%                              |
| Pantothenic acid, mg                             | 3.20               | 64%                              |
| Choline, mg                                      | 110.0              | 24%                              |
| Potassium, mg                                    | 350                | 18%                              |
| Magnesium, mg                                    | 30                 | 10%                              |
| Calcium, mg                                      | 1200               | 150%                             |
| Iron, mg                                         | 8.1                | 54%                              |
| Zinc, mg                                         | 9.00               | 60%                              |
| Lutein, µg                                       | 150                | –                                |
| Taurine, mg                                      | 30.0               | –                                |
| Docosahexaenoic acid, mg                         | 50.0               | –                                |
| Arachidonic acid, mg                             | 60.0               | –                                |
| Lactoferrin, mg                                  | 30.0               | –                                |

Ingredients: Raw milk, demineralized whey powder, galactooligosaccharides, α-whey protein powder, milk salt, (3R, 3'r) -dihydroxy-β-carotene (≥118µg/100g), docosahexaenoic acid (DHA), arachidonic acid (ARA), yeast β-glu- can, lactoferrin, taurine, lutein, bifidobacteria Bb-1 2(≥2×106CFU/g), Bifidobacterium lactis HN019(≥2×106CFU/g), and phospholipid. Vitamins: Vitamin A (retinyl acetate), vitamin D (cholecalciferol), vitamin E (DL-α-tocopherol acetate), vitamin B1(thiamine nitrate), vitamin K2, vitamin C (L-sodium ascorbate), folic acid, nicotinamide, D- calcium pantothenate, and choline chloride. Minerals: calcium carbonate, ferrous sulfate, and zinc sulfate.

**Table S2.** Comparison of means of bone mineral density (BMD) and bone mineral content (BMC) at baseline and their 12-month changes between the formula and control groups.

| Variables                 | Control<br>(n = 91) |       | Formula<br>(n = 83) |       | Change<br>(%) | <i>t</i> -test | ANCOVA* |
|---------------------------|---------------------|-------|---------------------|-------|---------------|----------------|---------|
|                           | Mean                | SD    | Mean                | SD    | F v C         |                |         |
| Left forearm BMD, g/cm²   |                     |       |                     |       |               |                |         |
| Baseline                  | 0.179               | 0.030 | 0.182               | 0.029 | 1.33          | 0.576          | 0.568   |
| 6 m                       | 0.185               | 0.030 | 0.193               | 0.030 | 4.37          | 0.065          | 0.061   |
| 12 m                      | 0.197               | 0.029 | 0.212               | 0.030 | 7.80          | <0.001         | <0.001  |
| Change_6 m                | 0.005               | 0.009 | 0.012               | 0.007 | 3.77          | <0.001         | <0.001  |
| Change_12 m               | 0.019               | 0.014 | 0.031               | 0.012 | 6.66          | <0.001         | <0.001  |
| Left forearm BMC, g       |                     |       |                     |       |               |                |         |
| Baseline                  | 0.240               | 0.049 | 0.243               | 0.051 | 0.94          | 0.755          | 0.747   |
| 6 m                       | 0.255               | 0.052 | 0.268               | 0.051 | 5.11          | 0.083          | 0.074   |
| 12 m                      | 0.270               | 0.057 | 0.287               | 0.059 | 6.17          | 0.059          | 0.052   |
| Change_6 m                | 0.015               | 0.019 | 0.026               | 0.018 | 4.55          | <0.001         | <0.001  |
| Change_12 m               | 0.031               | 0.026 | 0.045               | 0.022 | 5.76          | <0.001         | <0.001  |
| Left Calcaneus BMD, g/cm² |                     |       |                     |       |               |                |         |
| Baseline                  | 0.182               | 0.039 | 0.186               | 0.039 | 1.72          | 0.581          | 0.536   |
| 6 m                       | 0.194               | 0.034 | 0.196               | 0.038 | 0.80          | 0.770          | 0.756   |
| 12 m                      | 0.214               | 0.032 | 0.217               | 0.036 | 1.11          | 0.643          | 0.611   |
| Change_6 m                | 0.008               | 0.014 | 0.013               | 0.014 | 2.83          | 0.013          | 0.010   |
| Change_12 m               | 0.029               | 0.021 | 0.033               | 0.019 | 2.02          | 0.231          | 0.203   |
| Left Calcaneus BMC, g     |                     |       |                     |       |               |                |         |
| Baseline                  | 0.194               | 0.038 | 0.199               | 0.038 | 2.34          | 0.410          | 0.354   |
| 6 m                       | 0.206               | 0.033 | 0.207               | 0.037 | 0.73          | 0.769          | 0.755   |
| 12 m                      | 0.226               | 0.031 | 0.228               | 0.035 | 1.04          | 0.640          | 0.608   |
| Change_6 m                | 0.008               | 0.013 | 0.012               | 0.014 | 2.38          | 0.024          | 0.020   |
| Change_12 m               | 0.028               | 0.021 | 0.031               | 0.018 | 1.64          | 0.286          | 0.258   |

\*: Adjusting for corresponding baseline values (except for baseline measures analysis) depending on gender, age, mother's age, father's age, mother's BMI, father's BMI, mother's education level, father's education level, gestational age at birth, birth weight, breastfeeding time, mother's illness during pregnancy, use of nutritional supplements, dietary protein intake, dietary calcium intake, exercise, and sleeping time (method = stepwise).

**Table S3.** Comparison of means of bone metabolism markers at baseline and their 12-month changes between the formula and control groups.

| Variables          | Control<br>(n = 83) |        | Formula<br>(n = 83) |        | Change<br>(%) | <i>t</i> -test | ANCOVA* |
|--------------------|---------------------|--------|---------------------|--------|---------------|----------------|---------|
|                    | Mean                | SD     | Mean                | SD     | F v C         |                |         |
| β-CTx, ng/ml       |                     |        |                     |        |               |                |         |
| Baseline           | 0.814               | 0.180  | 0.764               | 0.156  | -6.17         | 0.051          | 0.052   |
| 6 m                | 0.989               | 0.210  | 0.909               | 0.185  | -8.06         | 0.007          | 0.007   |
| 12 m               | 1.237               | 0.281  | 1.233               | 0.247  | -0.32         | 0.924          | 0.922   |
| Change_6 m         | 0.178               | 0.201  | 0.154               | 0.157  | -3.04         | 0.375          | 0.392   |
| Change_12 m        | 0.402               | 0.253  | 0.473               | 0.250  | 8.75          | 0.086          | 0.079   |
| Trap-5b, pg/ml     |                     |        |                     |        |               |                |         |
| Baseline           | 676.5               | 151.5  | 676.8               | 156.0  | 0.05          | 0.990          | 0.990   |
| 6 m                | 470.7               | 136.9  | 422.3               | 132.2  | -10.27        | 0.016          | 0.017   |
| 12 m               | 583.3               | 210.7  | 571.4               | 218.3  | -2.04         | 0.720          | 0.724   |
| Change_6 m         | -204.1              | 202.9  | -258.5              | 203.6  | -8.04         | 0.085          | 0.087   |
| Change_12 m        | -95.7               | 270.6  | -114.1              | 293.4  | -2.73         | 0.688          | 0.687   |
| Osteocalcin, ng/ml |                     |        |                     |        |               |                |         |
| Baseline           | 57.32               | 12.31  | 57.55               | 12.22  | 0.40          | 0.903          | 0.899   |
| 6 m                | 64.53               | 13.56  | 61.57               | 14.54  | -4.58         | 0.163          | 0.132   |
| 12 m               | 63.36               | 14.90  | 62.18               | 12.79  | -1.86         | 0.592          | 0.580   |
| Change_6 m         | 7.085               | 11.547 | 2.733               | 10.288 | -7.59         | 0.012          | 0.017   |
| Change_12 m        | 7.419               | 12.902 | 4.432               | 13.920 | -5.21         | 0.181          | 0.173   |
| BAP, µg/L          |                     |        |                     |        |               |                |         |
| Baseline           | 84.59               | 19.73  | 86.86               | 17.83  | 2.68          | 0.427          | 0.437   |
| 6 m                | 91.62               | 17.67  | 91.56               | 14.86  | -0.06         | 0.982          | 0.981   |
| 12 m               | 93.23               | 19.41  | 94.21               | 14.81  | 1.05          | 0.727          | 0.727   |
| Change_6 m         | 8.995               | 16.179 | 5.052               | 15.848 | -4.66         | 0.117          | 0.111   |
| Change_12 m        | 9.561               | 15.290 | 8.592               | 13.070 | -1.15         | 0.683          | 0.673   |
| ALP, U/L           |                     |        |                     |        |               |                |         |
| Baseline           | 220.0               | 56.7   | 232.1               | 44.9   | 5.50          | 0.104          | 0.099   |
| 6 m                | 283.6               | 60.9   | 282.7               | 53.1   | -0.32         | 0.916          | 0.917   |
| 12 m               | 253.6               | 54.9   | 244.4               | 49.6   | -3.61         | 0.262          | 0.242   |
| Change_6 m         | 59.31               | 34.43  | 51.24               | 31.64  | -3.67         | 0.102          | 0.110   |
| Change_12 m        | 35.37               | 45.84  | 12.39               | 33.41  | -10.44        | <0.001         | <0.001  |

|                              |        |       |        |       |        |        |        |
|------------------------------|--------|-------|--------|-------|--------|--------|--------|
| 25(OH)D, ng/ml               |        |       |        |       |        |        |        |
| Baseline                     | 26.28  | 4.34  | 28.13  | 4.68  | 7.06   | 0.008  | 0.007  |
| 6 m                          | 22.36  | 4.75  | 26.01  | 5.05  | 16.29  | <0.001 | <0.001 |
| 12 m                         | 26.31  | 4.15  | 28.54  | 4.93  | 8.47   | 0.002  | 0.002  |
| Change_6 m                   | -3.697 | 2.734 | -2.241 | 2.817 | 5.54   | 0.001  | 0.001  |
| Change_12 m                  | 0.125  | 3.152 | 0.254  | 3.109 | 0.49   | 0.803  | 0.806  |
| 25(OH)D <sub>2</sub> , ng/ml |        |       |        |       |        |        |        |
| Baseline                     | 2.327  | 0.550 | 2.326  | 0.515 | -0.03  | 0.994  | 0.994  |
| 6 m                          | 2.383  | 0.578 | 2.471  | 0.927 | 3.73   | 0.452  | 0.433  |
| 12 m                         | 2.250  | 0.225 | 2.250  | 0.298 | 0.00   | 1.000  | 1.000  |
| Change_6 m                   | 0.025  | 0.684 | 0.085  | 0.922 | 2.57   | 0.649  | 0.634  |
| Change_12 m                  | -0.057 | 0.800 | -0.070 | 0.548 | -0.55  | 0.909  | 0.907  |
| 25(OH)D <sub>3</sub> , ng/ml |        |       |        |       |        |        |        |
| Baseline                     | 25.41  | 4.32  | 27.54  | 4.56  | 8.40   | 0.002  | 0.001  |
| 6 m                          | 21.78  | 4.75  | 24.71  | 5.33  | 13.47  | <0.001 | <0.001 |
| 12 m                         | 25.72  | 4.57  | 27.90  | 5.22  | 8.48   | 0.005  | 0.004  |
| Change_6 m                   | -3.844 | 3.380 | -2.358 | 3.503 | 5.85   | 0.007  | 0.007  |
| Change_12 m                  | 0.490  | 3.404 | 0.511  | 3.522 | 0.09   | 0.970  | 0.970  |
| PTH, pmol/L                  |        |       |        |       |        |        |        |
| Baseline                     | 1.986  | 0.578 | 2.117  | 0.685 | 6.63   | 0.178  | 0.162  |
| 6 m                          | 2.426  | 0.625 | 2.237  | 0.606 | -7.80  | 0.043  | 0.042  |
| 12 m                         | 2.751  | 0.829 | 2.601  | 0.666 | -5.46  | 0.200  | 0.202  |
| Change_6 m                   | 0.504  | 0.592 | 0.202  | 0.687 | -15.22 | 0.003  | 0.003  |
| Change_12 m                  | 0.710  | 0.703 | 0.500  | 0.685 | -10.61 | 0.066  | 0.061  |
| IGF-1, ng/ml                 |        |       |        |       |        |        |        |
| Baseline                     | 99.98  | 31.61 | 103.90 | 37.22 | 3.92   | 0.461  | 0.408  |
| 6 m                          | 108.84 | 32.27 | 119.32 | 42.54 | 9.63   | 0.066  | 0.051  |
| 12 m                         | 117.30 | 40.52 | 121.23 | 42.15 | 3.36   | 0.548  | 0.533  |
| Change_6 m                   | 8.52   | 22.92 | 16.88  | 19.35 | 8.36   | 0.014  | 0.018  |
| Change_12 m                  | 10.75  | 26.14 | 18.40  | 24.40 | 7.65   | 0.070  | 0.068  |

\*: Adjusting for corresponding baseline values (except for baseline measures analysis) depending on gender, age, mother's age, father's age, mother's BMI, father's BMI, mother's education level, father's education level, gestational age at birth, birth weight, breastfeeding time, mother's illness during pregnancy, use of nutritional supplements, dietary protein intake, dietary calcium intake, exercise, and sleeping time (method = stepwise).

Abbreviations:  $\beta$ -CTx,  $\beta$ -C-terminal telopeptides; ALP, alkaline phosphatase; BAP, bone-specific alkaline phosphatase; Change\_6 m/ Change\_12 m: changes in BMD or BMC from baseline to 6/12 months; Change (%): percentage changes = (changes/baseline value)  $\times$  100%; IGF-1, insulin-like growth factor-1; PTH, parathyroid hormone.
